# Supplementary material for: Group 2 metal (Mg, Ca, Sr) silylamides supported by a cyclen-derived macrocyclic polyamine
Source: Royal Society of Chemistry journal article supplement (doi:10.1039/c7dt01727h), 2017-01-01
Supplement: c7dt01727h1.pdf [file c7dt01727h1.pdf]

**Electronic Supporting Information**

**Group 2 metal (Mg, Ca, Sr) silylamides supported by a cyclen-derived  
macrocyclic polyamine**

Debabrata Mukhejee, Satoru Shirase, Klaus Beckerle, Thomas P. Spaniol, Kazushi Mashima,  
and Jun Okuda\*

Institute of Inorganic Chemistry, RWTH Aachen University, Landoltweg 1, 52056 Aachen, Germany  
Graduate School of Engineering Science, Osaka University, Toyonaka, Osaka 560–8531, Japan

**Table of Contents**

|                                                                      |            |
|----------------------------------------------------------------------|------------|
| <b>Spectroscopic characterization of compounds 1-6.....</b>          | <b>S2</b>  |
| <b>Variable temperature <sup>1</sup>H NMR spectroscopy of 6.....</b> | <b>S14</b> |
| <b>Line shape analysis and Eyring plot.....</b>                      | <b>S15</b> |
| <b>X-ray crystallography.....</b>                                    | <b>S17</b> |
| <b>References .....</b>                                              | <b>S19</b> |

## 1. Spectroscopic characterization of compounds 1-6.

[(L)Sr{N(SiMe<sub>3</sub>)<sub>2</sub>}] (1).

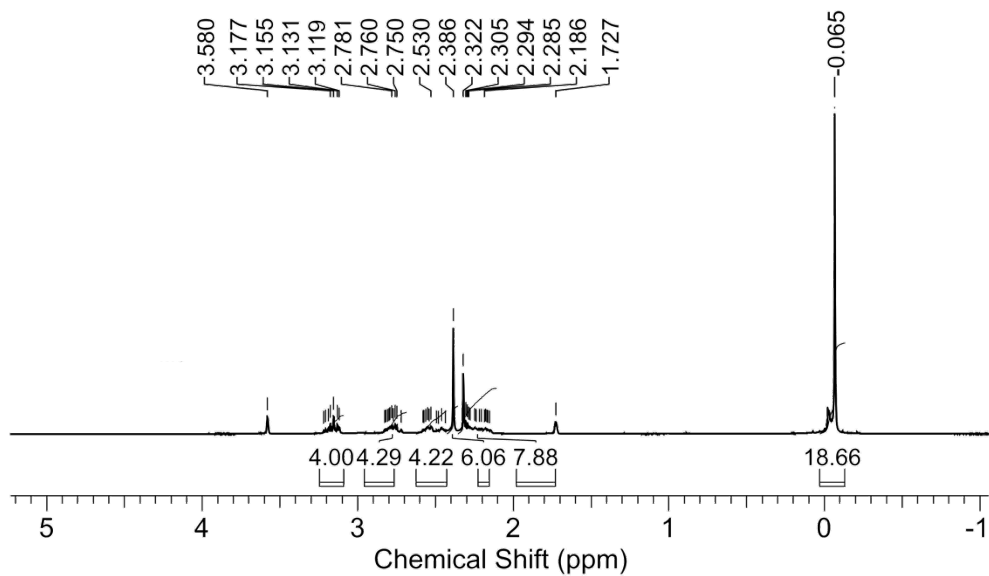

Figure S1. <sup>1</sup>H NMR spectrum of 1 in THF-*d*<sub>8</sub>.

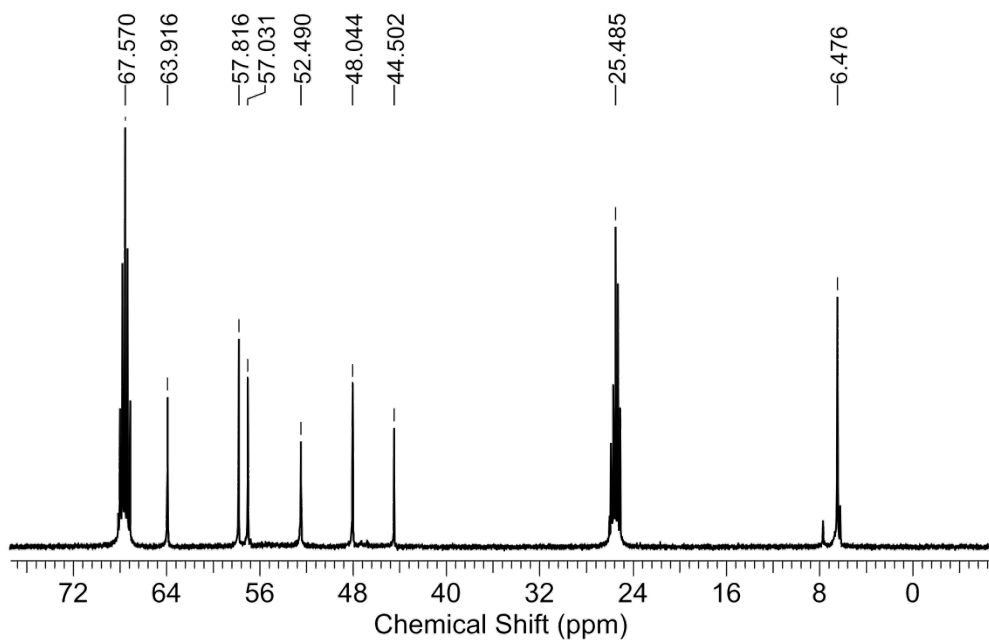

Figure S2. <sup>13</sup>C{<sup>1</sup>H} NMR spectrum of 1 in THF-*d*<sub>8</sub>.

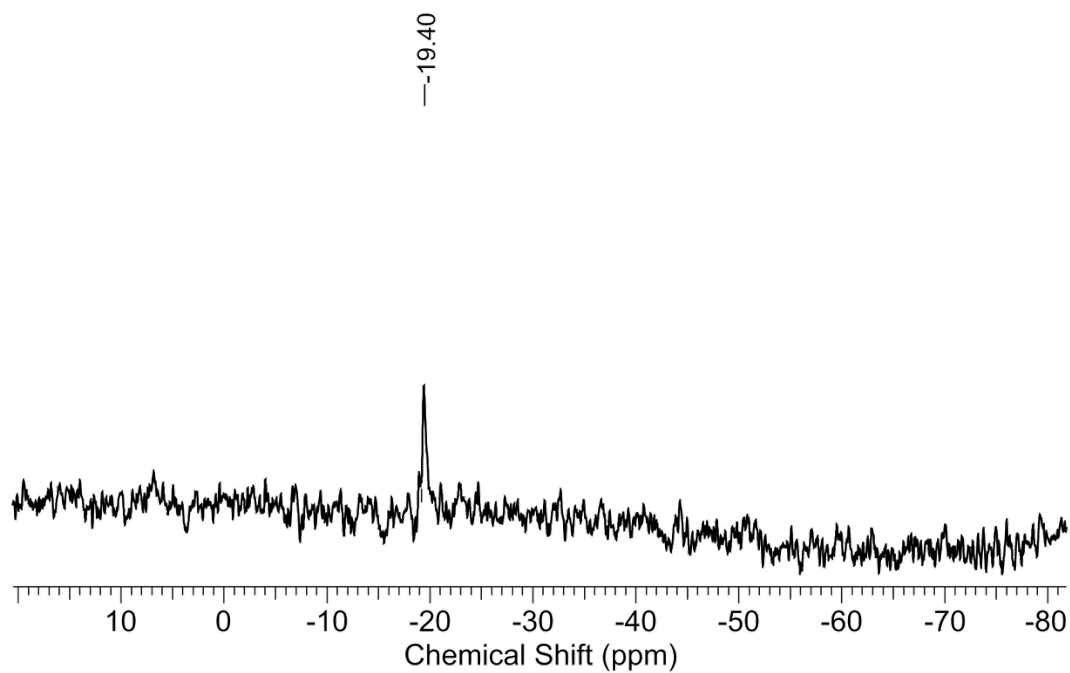

**Figure S3.**  $^{29}\text{Si}\{^1\text{H}\}$  NMR spectrum of **1** in  $\text{THF-}d_8$ .

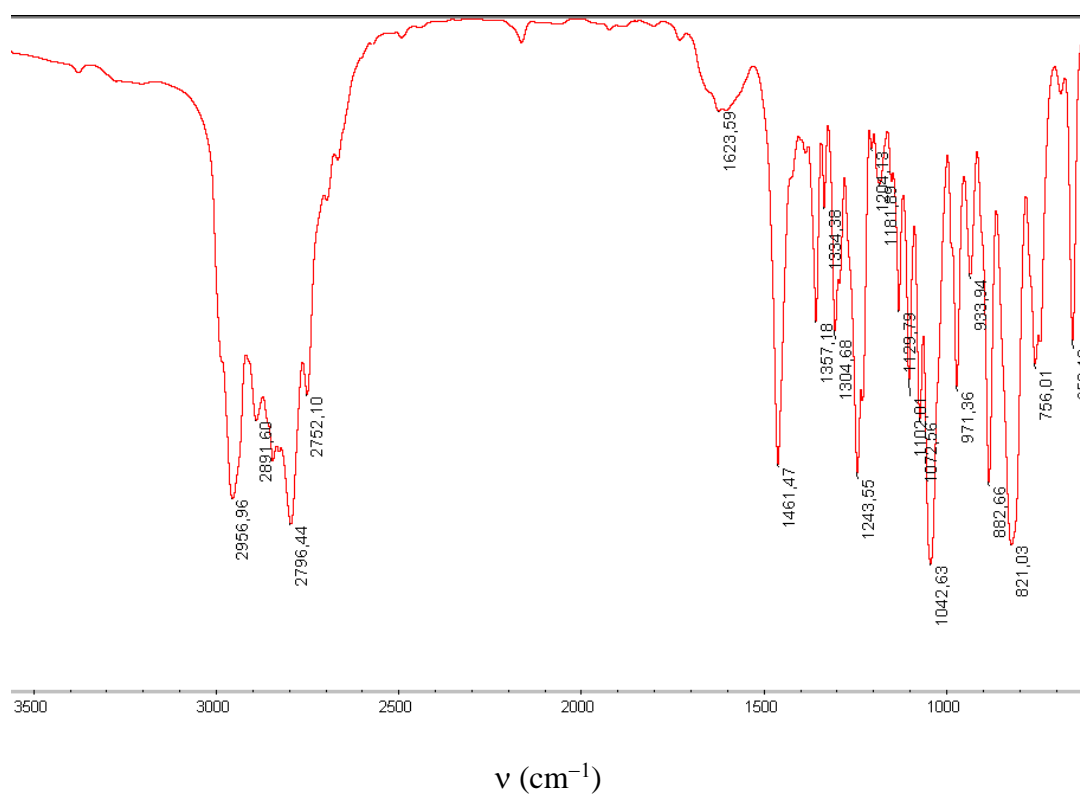

**Figure S4.** FT-IR (KBr) spectrum of **1**.

[(LH)Sr{N(SiHMe<sub>2</sub>)<sub>2</sub>}]<sub>2</sub> (**2**).

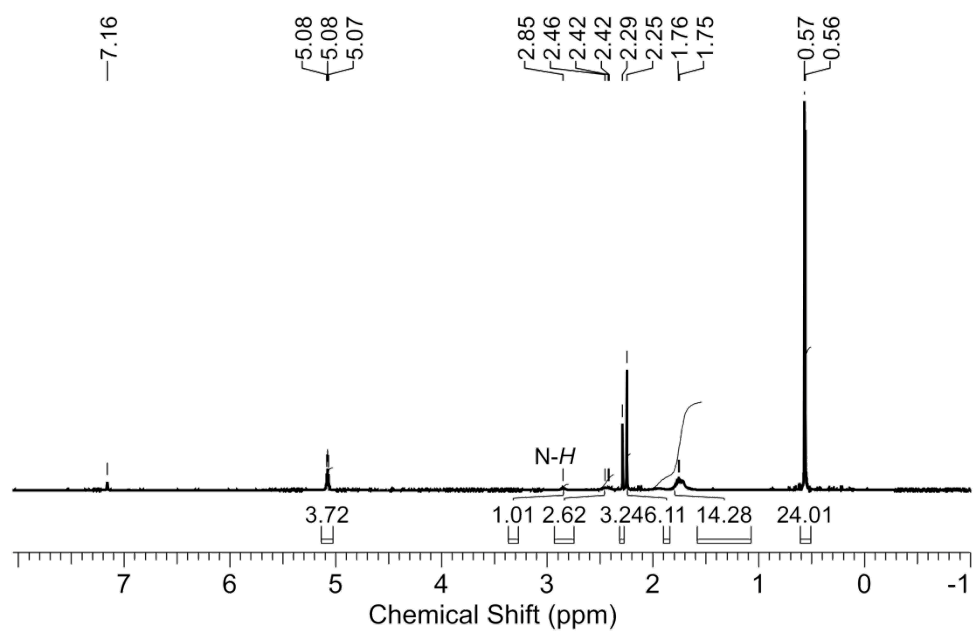

Figure S5. <sup>1</sup>H NMR spectrum of **2** in benzene-*d*<sub>6</sub>.

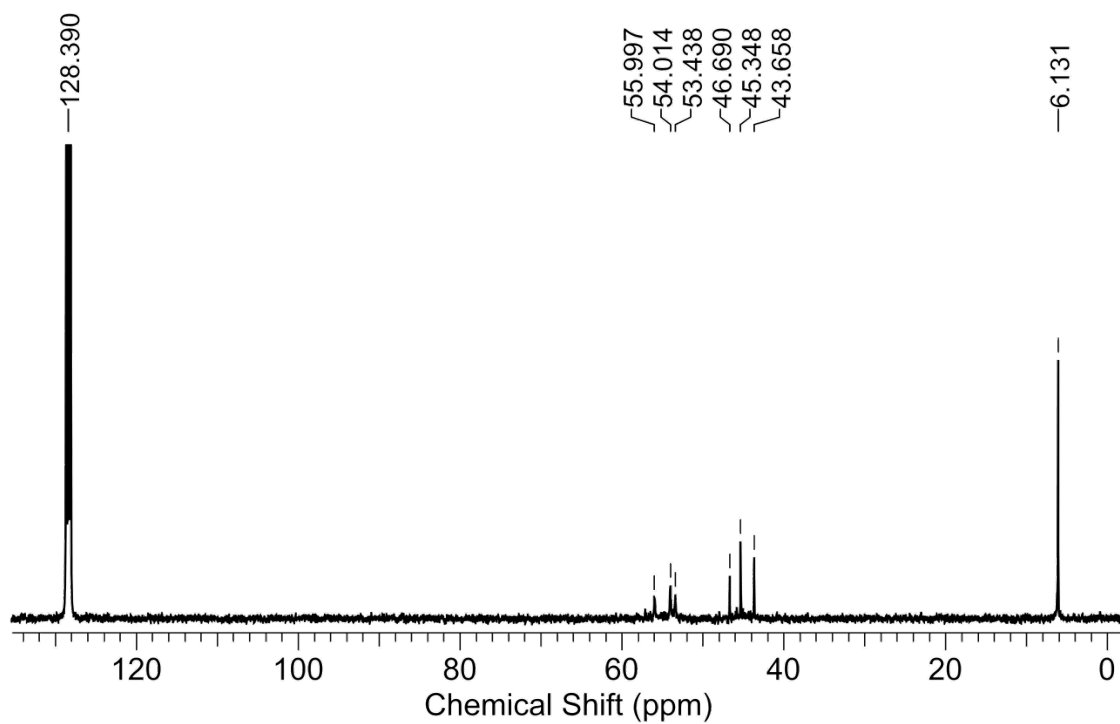

Figure S6. <sup>13</sup>C{<sup>1</sup>H} NMR spectrum of **2** in benzene-*d*<sub>6</sub>.

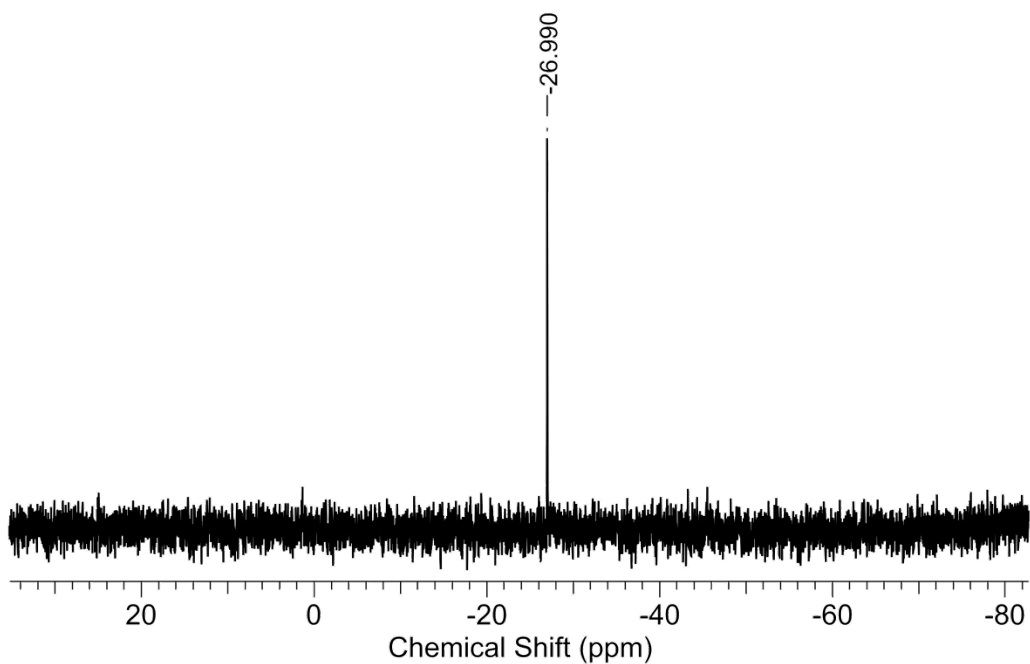

**Figure S7.**  $^{29}\text{Si}\{^1\text{H}\}$  NMR spectrum of **2** in benzene- $d_6$ .

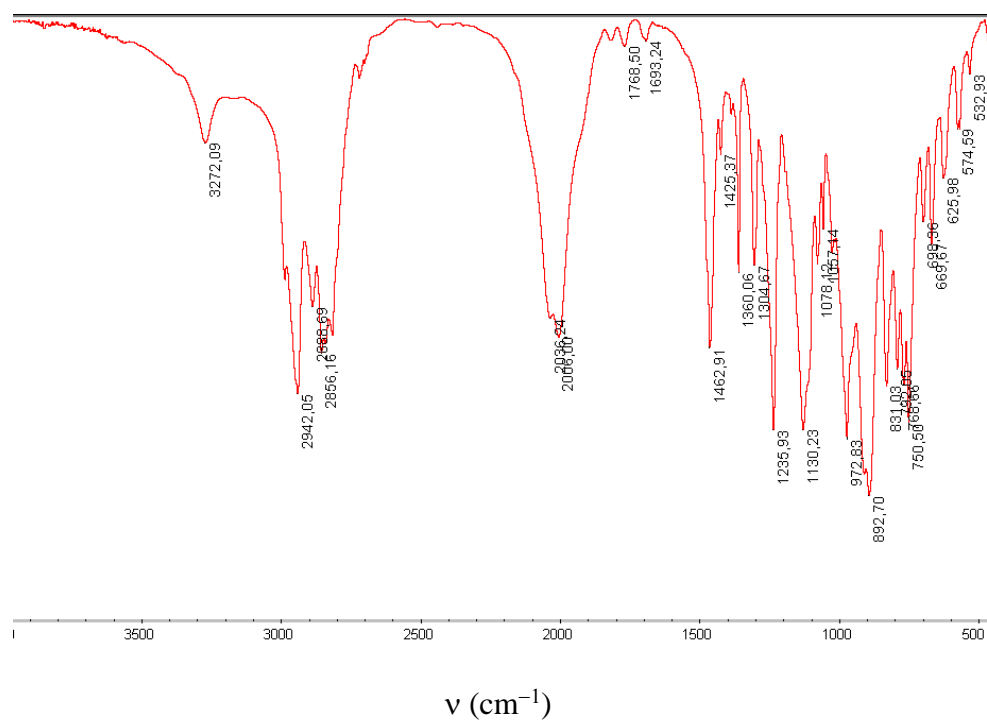

**Figure S8.** FT-IR (KBr) spectrum of **2**.

**[[*(L)*SiMe<sub>2</sub>N(SiHMe<sub>2</sub>)]Sr{N(SiHMe<sub>2</sub>)<sub>2</sub>}] (3).**

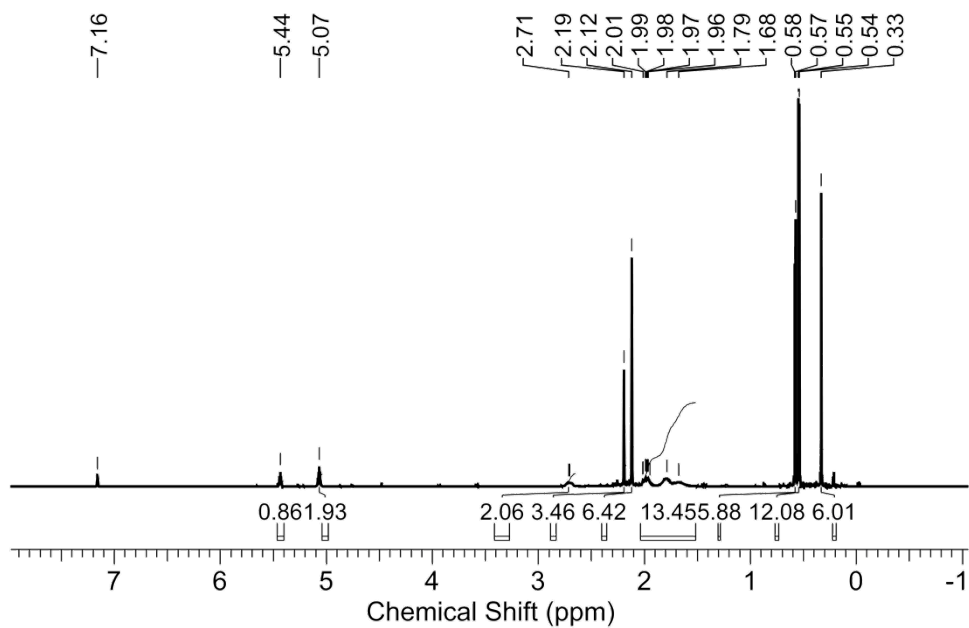

**Figure S9.** <sup>1</sup>H NMR spectrum of **3** in benzene-*d*<sub>6</sub>.

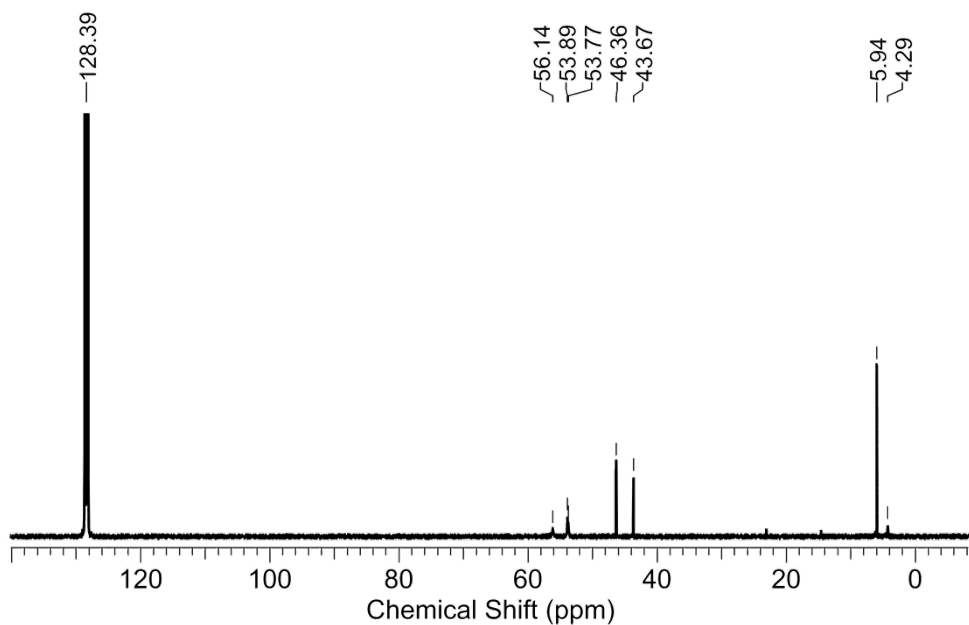

**Figure S10.** <sup>13</sup>C{<sup>1</sup>H} NMR spectrum of **3** in benzene-*d*<sub>6</sub>.

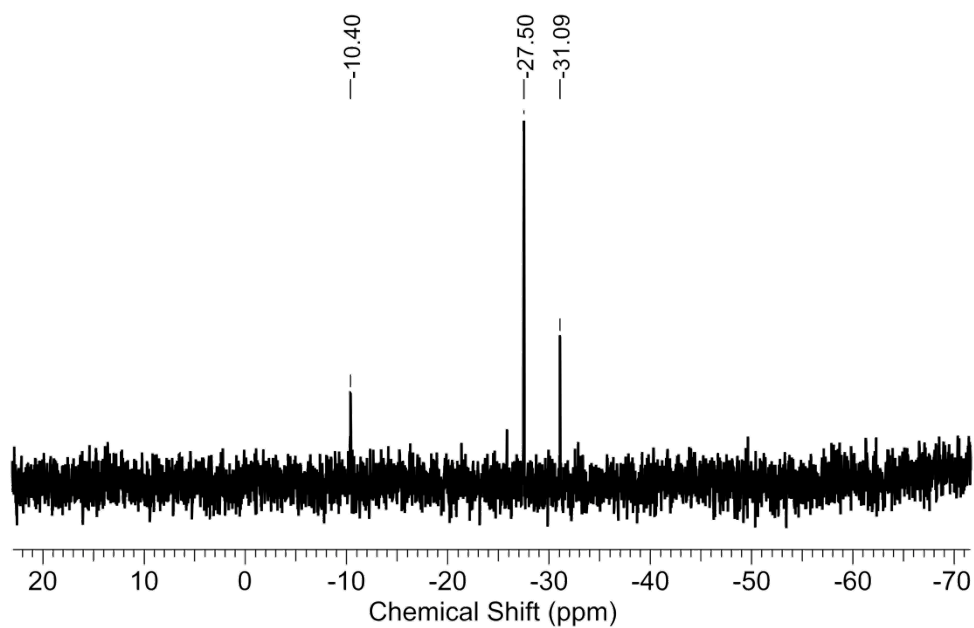

**Figure S11.**  $^{29}\text{Si}\{^1\text{H}\}$  NMR spectrum of **3** in benzene- $d_6$ .

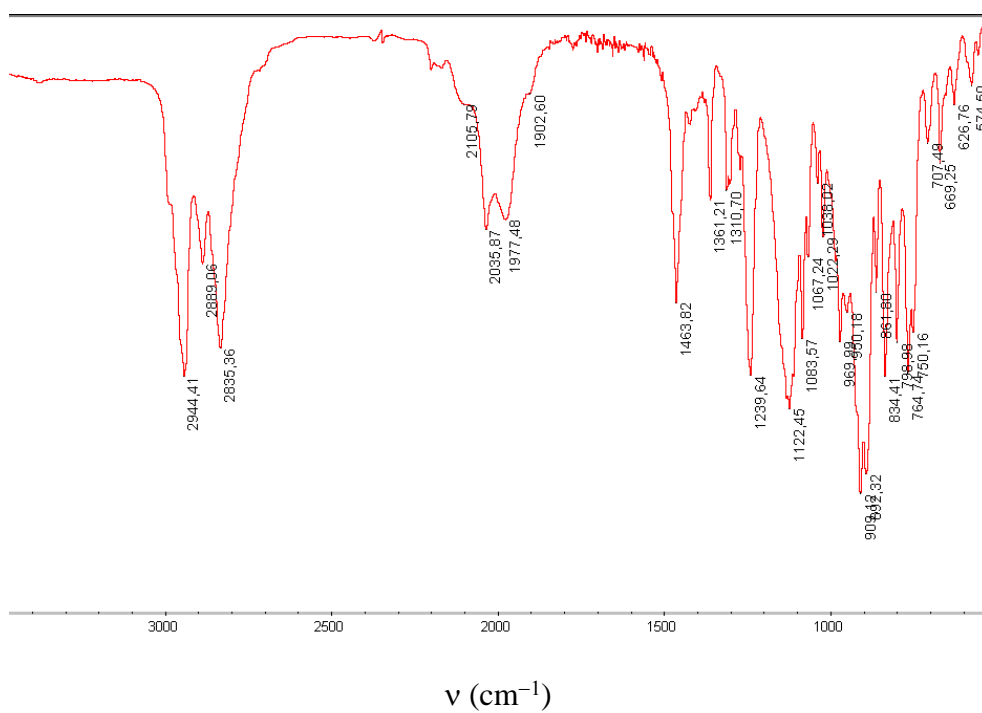

**Figure S12.** FT-IR (KBr) spectrum of **3**.

**[{(L)SiMe<sub>2</sub>N(SiHMe<sub>2</sub>)}Sr{N(SiMe<sub>3</sub>)<sub>2</sub>}] (4).**

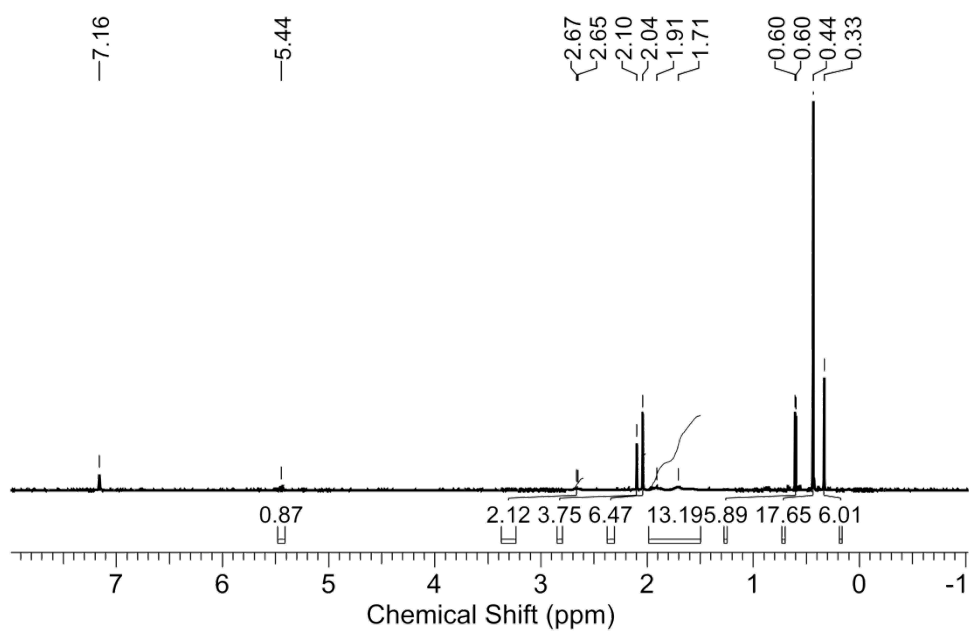

**Figure S13.** <sup>1</sup>H NMR spectrum of **4** in benzene-*d*<sub>6</sub>.

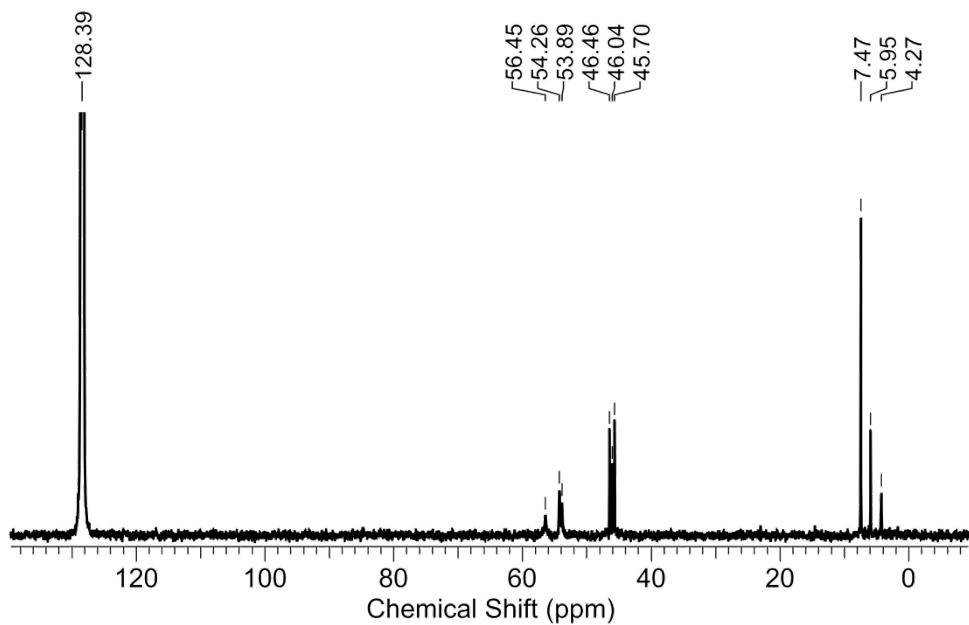

**Figure S14.** <sup>13</sup>C{<sup>1</sup>H} NMR spectrum of **4** in benzene-*d*<sub>6</sub>.



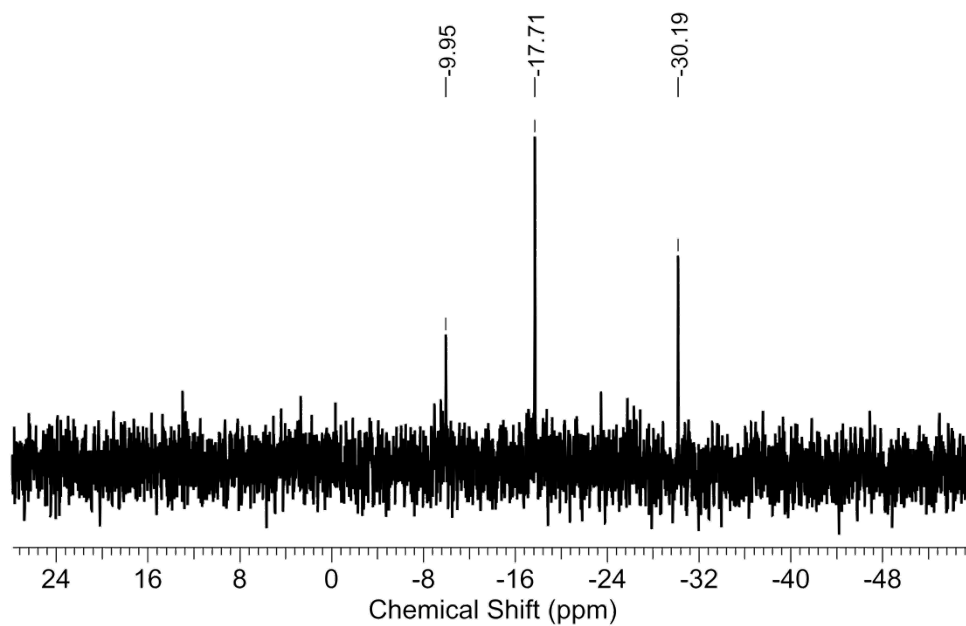

**Figure S15.**  $^{29}\text{Si}\{^1\text{H}\}$  NMR spectrum of **4** in benzene- $d_6$ .

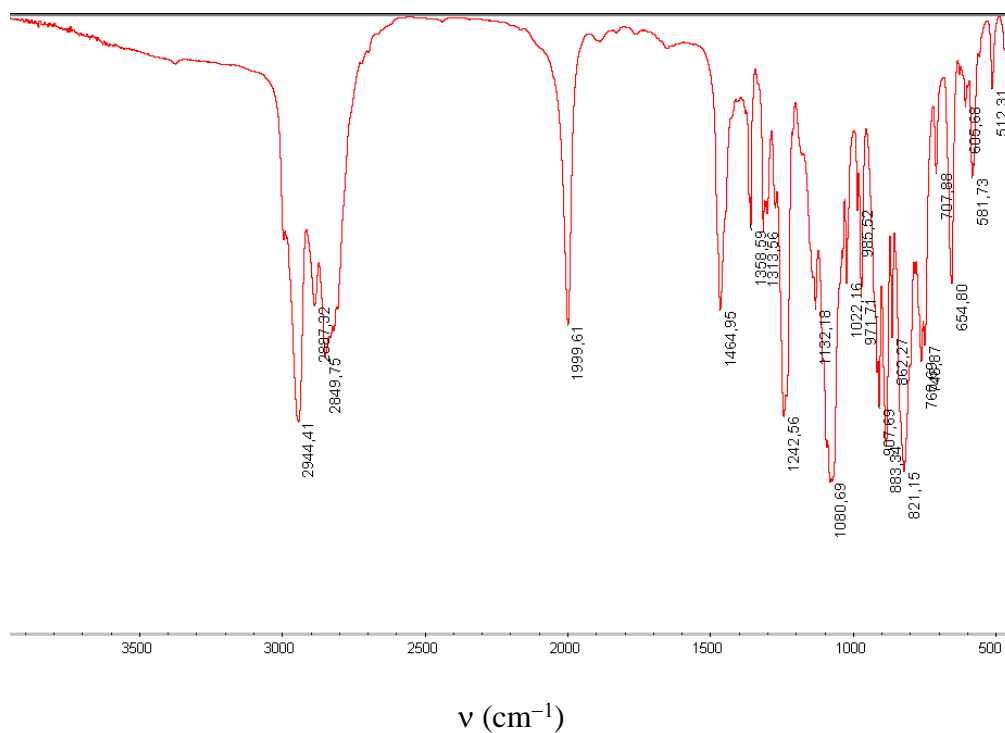

**Figure S16.** FT-IR (KBr) spectrum of **4**.

**[(L)Mg{N(SiHMe<sub>2</sub>)<sub>2</sub>}] (5).**

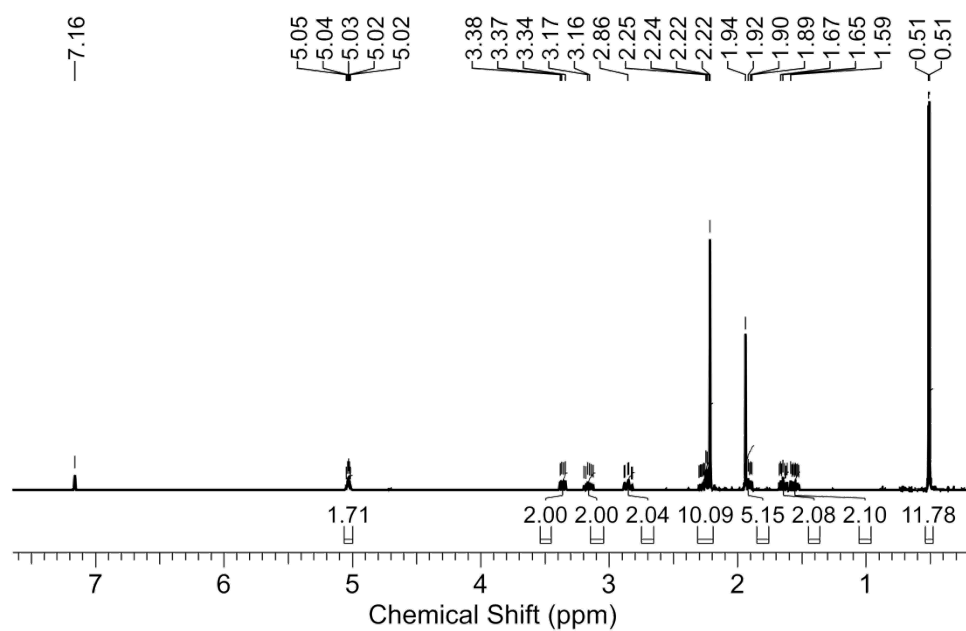

**Figure S17.** <sup>1</sup>H NMR spectrum of **5** in benzene-*d*<sub>6</sub>.

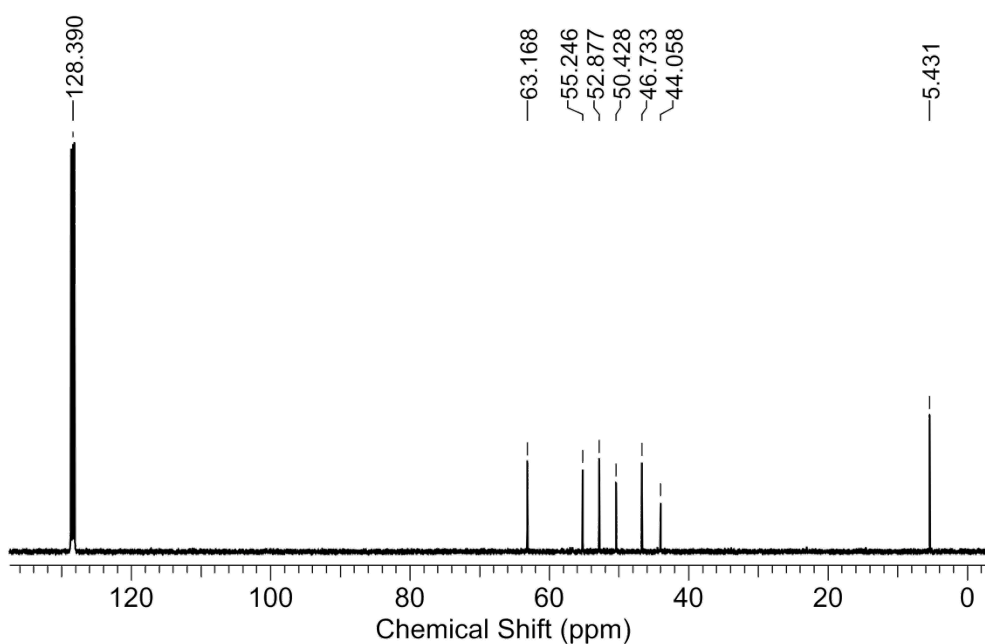

**Figure S18.** <sup>13</sup>C{<sup>1</sup>H} NMR spectrum of **5** in benzene-*d*<sub>6</sub>.

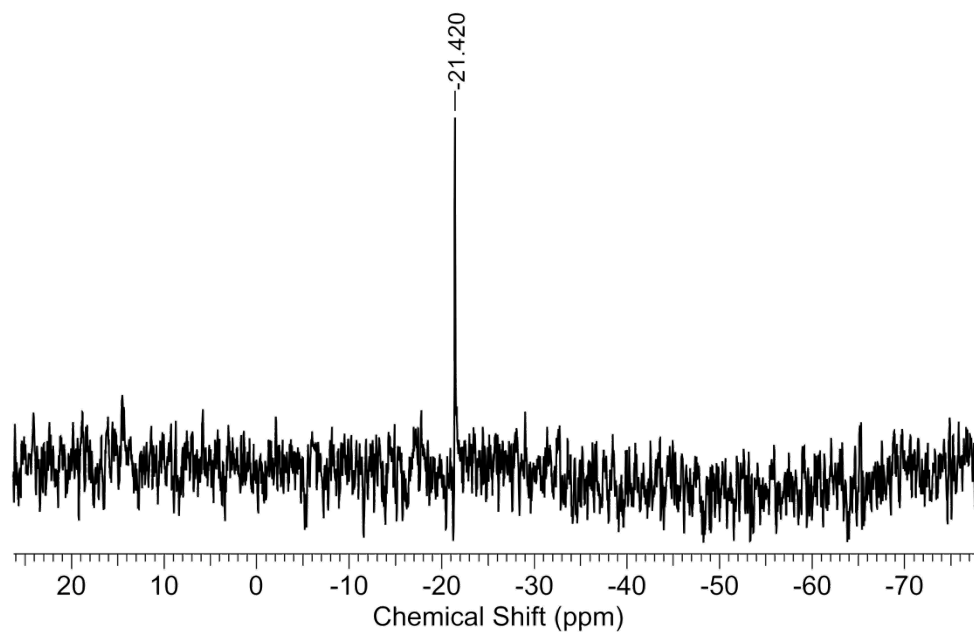

**Figure S19.**  $^{29}\text{Si}\{^1\text{H}\}$  NMR spectrum of **5** in benzene- $d_6$ .

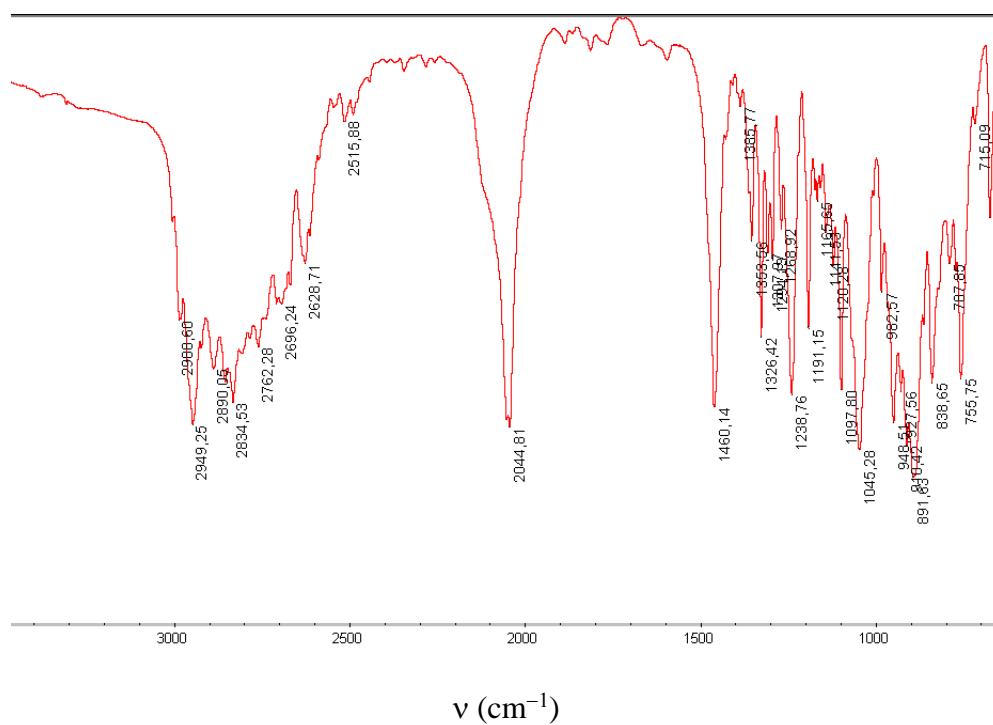

**Figure S20.** FT-IR (KBr) spectrum of **5**.

[(L)Ca{N(SiHMe<sub>2</sub>)<sub>2</sub>}] (6).

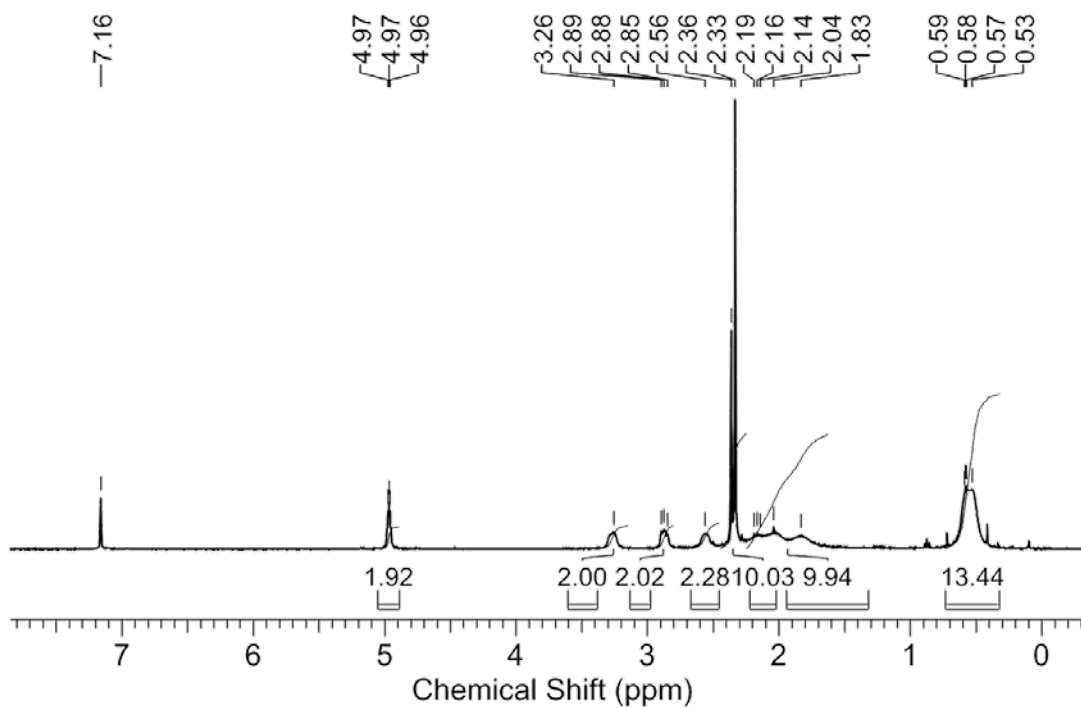

Figure S21. <sup>1</sup>H NMR spectrum of **6** in benzene-*d*<sub>6</sub>.

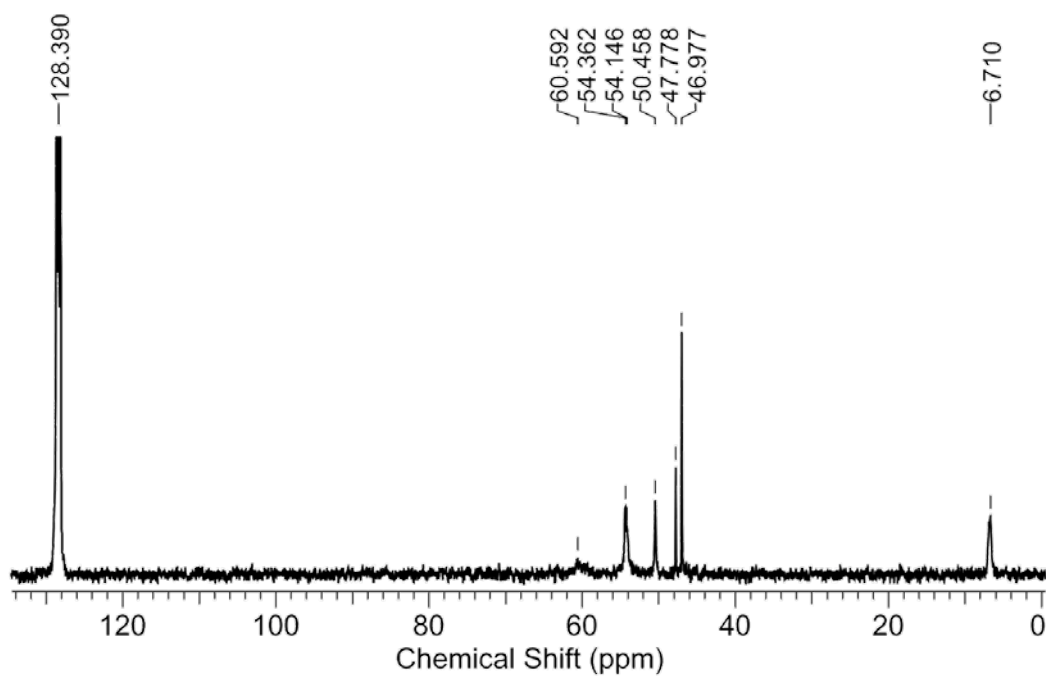

Figure S22. <sup>13</sup>C{<sup>1</sup>H} NMR spectrum of **6** in benzene-*d*<sub>6</sub>.

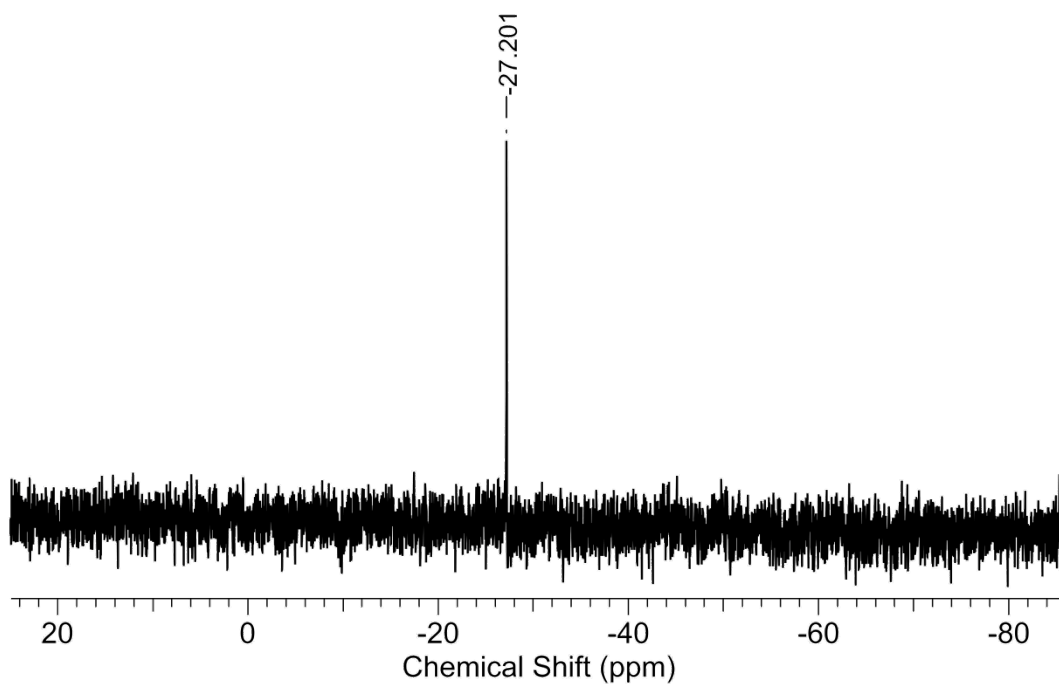

**Figure S23.**  $^{29}\text{Si}\{^1\text{H}\}$  NMR spectrum of **6** in benzene- $d_6$ .

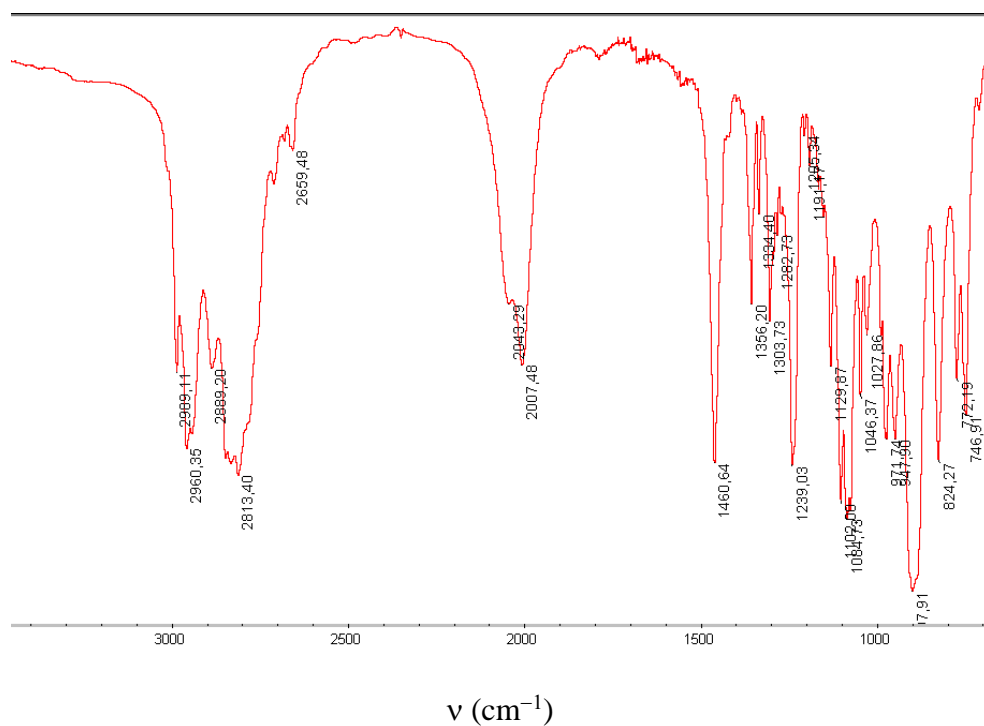

**Figure S24.** FT-IR (KBr) spectrum of **6**.

## 2. Variable temperature $^1\text{H}$ NMR spectroscopy of **6**.

Variable temperature NMR analysis was conducted on a freshly prepared toluene- $d_8$  solution of **6**. The SiH resonance at 4.88 ppm ( $^1J_{\text{SiH}} = 164$  Hz) at 298 K broadens and shifts downfield at 253 K. Further cooling gives two separate and well-resolved resonances of equal intensity at 5.15 ppm ( $^1J_{\text{SiH}} = 172$  Hz) and 4.90 ppm ( $^1J_{\text{SiH}} = 158$  Hz) at 193 K with a frequency difference of  $\Delta\nu_{\text{C}} = 101$  Hz. Likewise, the initially broad SiHMe<sub>2</sub> signal at room temperature splits into four separate resonances at 193 K. For the ligand L, the two sharp NMe singlets are severely broadened at low temperature. The CH<sub>2</sub> protons of the Me<sub>3</sub>TACD ligand that were initially broad at room temperature become sharper at low temperature with two sets significantly moved to higher field.

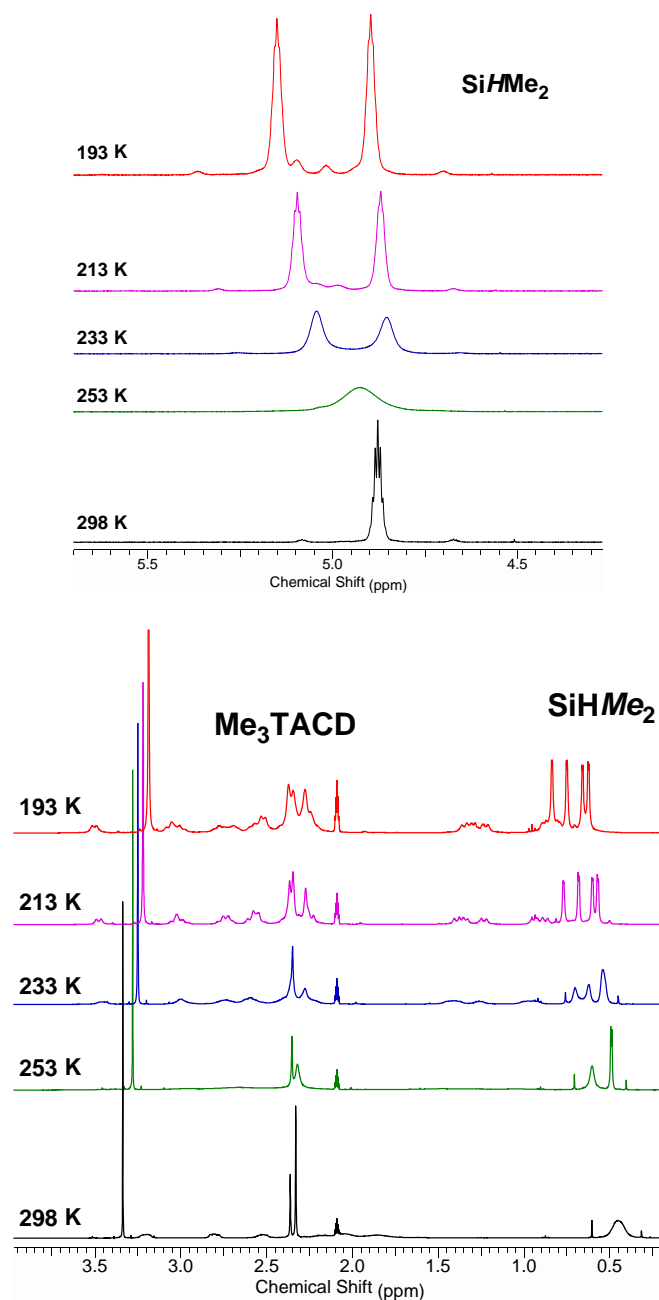

**Figure S25.** Variable temperature NMR spectra of **6** in Toluene- $d_8$ . **Top:** SiHMe<sub>2</sub> region. **Bottom:** Me<sub>3</sub>TACD and SiHMe<sub>2</sub> region.

### 3. Line shape analysis and Eyring plot.

Line shape analysis was carried out with the program TopSpin 3.2 starting from a model of two spins-1/2 at 5.10 ppm (experimental low temperature limit) and 4.85 ppm.<sup>S1</sup> An interaction with two further spins with a pseudospin of 3 (each) at 0.58 and 0.79 ppm due to the methyl groups was simulated with coupling constants of  $J = 4.0$  Hz. The reaction was defined as an exchange of spin 1 against spin 2 (and vice versa). The exchange rate and the overall shift of the signals were adjusted manually to obtain the best overlap. This model agrees with a process in which the two silicon-bonded protons exchange at elevated temperature. However, it does not describe the more complex behavior observed for the methyl groups. The significant overall shift of the SiH-signals with increasing temperature implies additional processes other than the exchange of  $\beta$ -agostic interactions.

Spin 1 5.1059ppm/pseudospin 0.5  
Spin 2 4.8528 ppm/pseudospin 0.5  
Spin 3 0.583 ppm/pseudospin 3  
Spin 4 0.7929ppm/pseudospin 3  
J1/3 4.0Hz  
J2/4 4.0Hz  
LB 5 Hz  
Exchanges  
1-2  
2-1  
k= 0 Hz  
Best Overlap  
76.398 %  
Intensity 40 600

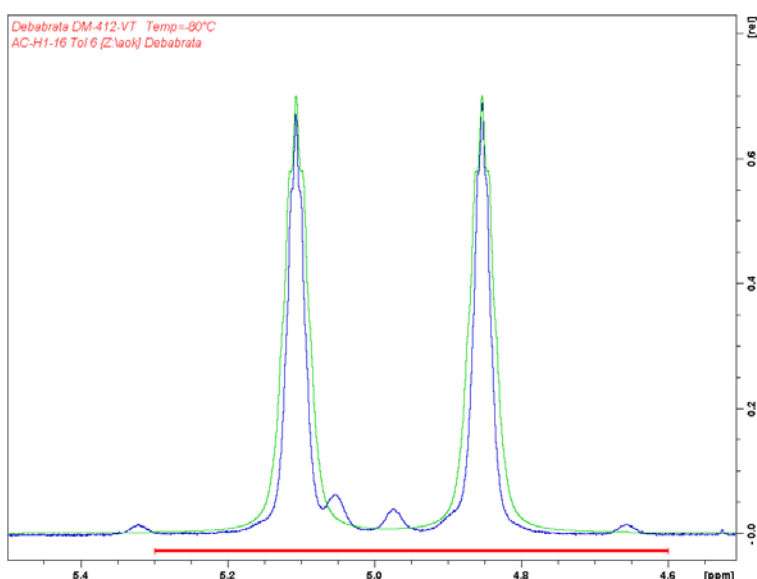

Spin 1 5.06 ppm/pseudospin 0.5  
Spin 2 4.81 ppm/pseudospin 0.5  
Spin 3 0.583 ppm/pseudospin 3  
Spin 4 0.7929ppm/pseudospin 3  
J1/3 4.0Hz  
J2/4 4.0Hz  
LB3.2 Hz  
Exchanges  
1-2  
2-1  
k= 9 Hz  
Best Overlap  
63.744%  
Fit 4.6 – 5.4  
Intensity 40 550

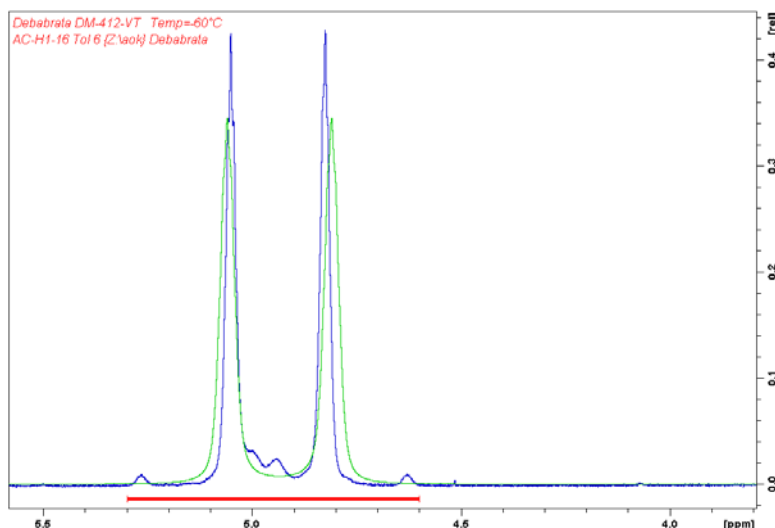

Spin 1 5.0012 ppm/pseudospin 0.5  
 Spin 2 4.8064 ppm/pseudospin 0.5  
 Spin 3 0.583 ppm/pseudospin 3  
 Spin 4 0.7929ppm/pseudospin 3  
 J1/3 4.0Hz  
 J2/4 4.0Hz  
 LB3.5 Hz  
 Exchanges  
 1-2  
 2-1  
 k= 31.15 Hz  
 Best Overlap  
 81.414%  
 Fit 4.6 – 5.4  
 Intensity 40 550

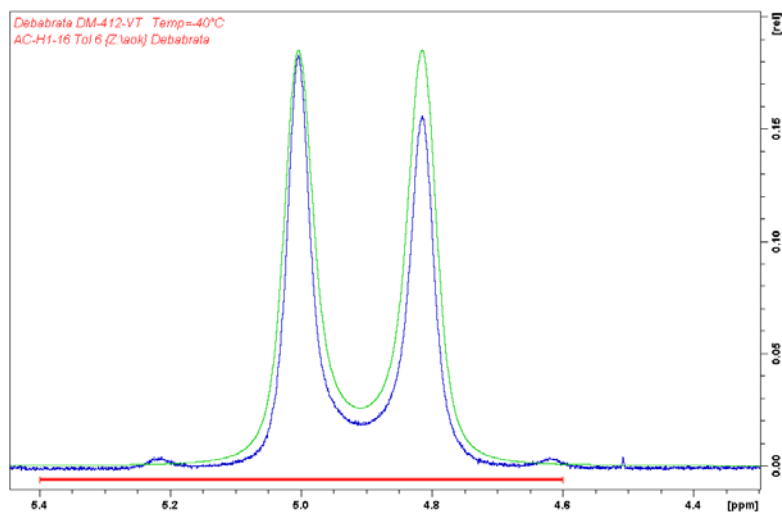

Spin 1 5.0 ppm/pseudospin 0.5  
 Spin 2 4.75 ppm/pseudospin 0.5  
 Spin 3 0.583 ppm/pseudospin 3  
 Spin 4 0.7929ppm/pseudospin 3  
 J1/3 4.0Hz  
 J2/4 4.0Hz  
 LB2.8 Hz  
 Exchanges  
 1-2  
 2-1  
 k= 552.585 Hz  
 Best Overlap  
 92.434%  
 Fit 4.6 – 5.4  
 Intensity 24 200

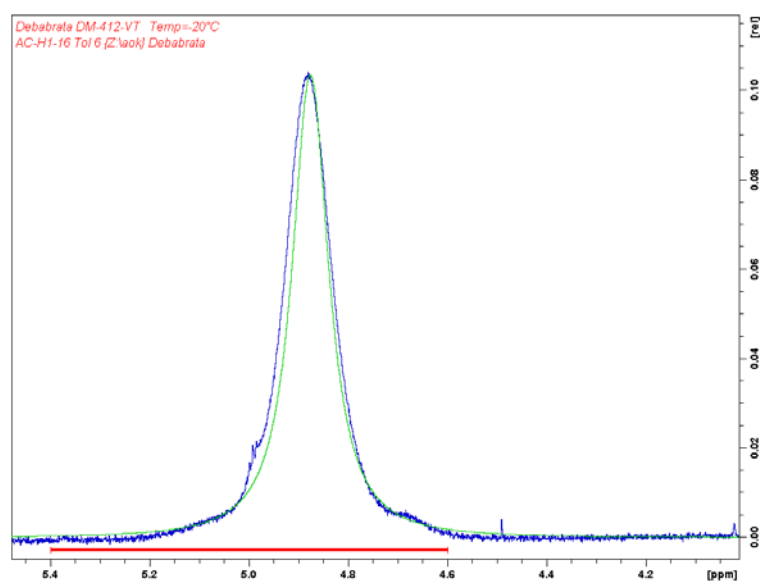

Spin 1 4.955 ppm/pseudospin 0.5  
 Spin 2 4.705 ppm/pseudospin 0.5  
 Spin 3 0.583 ppm/pseudospin 3  
 Spin 4 0.7929ppm/pseudospin 3  
 J1/3 4.0Hz  
 J2/4 4.0Hz  
 LB1.5 Hz  
 Exchanges  
 1-2  
 2-1  
 k= 10000 Hz  
 Best Overlap  
 85.394%  
 Fit 4.6 – 5.4  
 Intensity 30 860

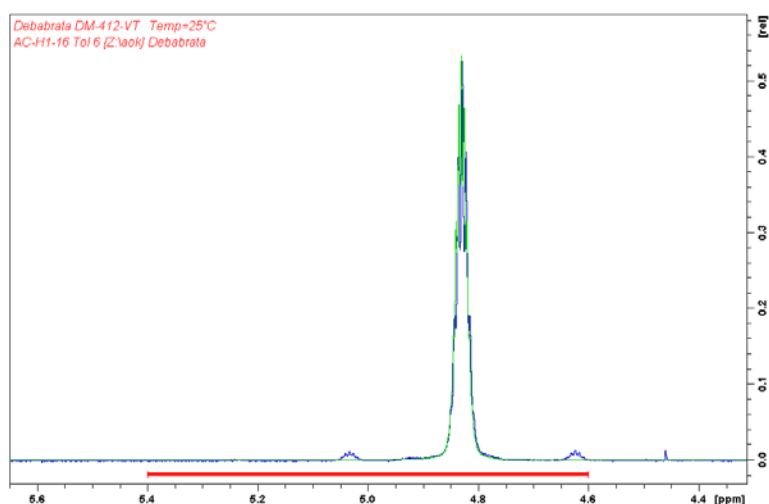

**Figure S26.** Experimental (blue) and simulated (green)  $^1\text{H}$  NMR spectra of **6** for line shape analysis. The red bar marks the refined area.



An Eyring plot derived from the above analysis provides the activation parameters as  $\Delta H^\ddagger = 9.7 \pm 0.8 \text{ kcal mol}^{-1}$  and  $\Delta S^\ddagger = -8.0 \pm 0.4 \text{ cal mol}^{-1} \text{ K}^{-1}$  that lead to  $\Delta G^\ddagger_{253\text{K}} = 11.7 \pm 0.9 \text{ kcal mol}^{-1}$  at the coalescence temperature 253 K.

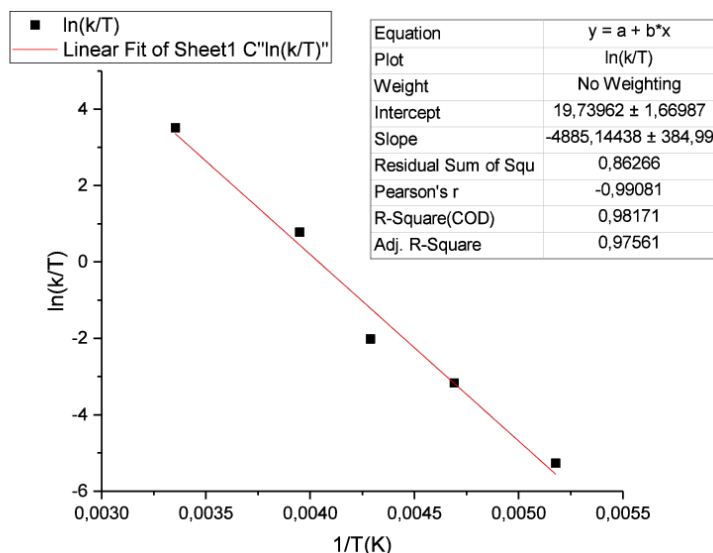

**Figure S27.** Eyring plot for the simulated exchange rates.

#### 4. X-ray crystallography.

Single-crystal X-ray diffraction measurements of **1**, **2**, **3**, **4** and **5** were performed on a Bruker AXS diffractometer equipped with an Incoatec microsource and an APEX area detector using MoK $\alpha$  radiation ( $\lambda = 0.71073 \text{ \AA}$ ), multilayer optics and  $\omega$ -scans. Temperature control was achieved with an Oxford cryostream 700. The SMART program was used for data collection and unit cell determination; processing of the raw data frame was performed using SAINT+,<sup>S2</sup> multi scan absorption corrections were applied with SADABS.<sup>S3</sup> The structures were solved by direct methods (SIR-92).<sup>S4</sup> **1** shows crystallographic inversion symmetry for the molecule. Compound **2** shows crystallographic  $C_2$  symmetry, atom Si1 is located on the axis of rotation. The CH<sub>2</sub> carbon atoms of the Me<sub>3</sub>TACD ligands in **1** (C1 – C8) are disordered. The disorder could be modeled with split positions. The CH<sub>2</sub> carbon atoms of the Me<sub>3</sub>TACD ligand in **2** as well as the amido nitrogen atom N2 and the CH<sub>3</sub> carbon atom C6 are disordered. The disorder was modeled with split positions. The refinements were performed against  $F^2$  with the program SHELXL-2013 using all reflections.<sup>S5</sup> Hydrogen atoms were included as riding on calculated positions with  $U_{\text{iso}}(\text{H}) = 1.2U_{\text{eq}}(\text{C})$  or  $1.5U_{\text{eq}}(\text{non-H})$ , except for the atoms bound

to silicon (H1 and H2 in **2**, H2, H3 and H4 in **3** as well as H2 in **4**, H1 and H2 in **5**). These atoms were localized in difference Fourier maps and refined in their position with isotropic displacement parameters  $U_{\text{iso}}(\text{H}) = 1.2U_{\text{eq}}(\text{Si})$ . All non-hydrogen atoms were refined anisotropically. Refinement results are given in Table S1. Graphical representations were performed with the program DIAMOND.<sup>S6</sup> CCDC-1537652 (**1**), -1537653 (**2**), -1537654 (**3**), -1537655 (**4**), -1537656 (**5**) contain the supplementary crystallographic data for this paper. These data can be obtained free of charge from the Crystallographic Data Centre via [www.ccdc.cam.ac.uk/data\\_request/cif](http://www.ccdc.cam.ac.uk/data_request/cif).

**Table S1.** Crystal data and structure refinement.

|                                            | <b>1</b>                                                        | <b>2</b>                                                   | <b>3</b>                                                   | <b>4</b>                                                   | <b>5</b>                                            |
|--------------------------------------------|-----------------------------------------------------------------|------------------------------------------------------------|------------------------------------------------------------|------------------------------------------------------------|-----------------------------------------------------|
| chemical formula                           | $\text{C}_{34}\text{H}_{86}\text{N}_{10}\text{Si}_4\text{Sr}_2$ | $\text{C}_{19}\text{H}_{54}\text{N}_6\text{Si}_4\text{Sr}$ | $\text{C}_{19}\text{H}_{52}\text{N}_6\text{Si}_4\text{Sr}$ | $\text{C}_{21}\text{H}_{56}\text{N}_6\text{Si}_4\text{Sr}$ | $\text{C}_{15}\text{H}_{39}\text{N}_5\text{MgSi}_2$ |
| fw (g·mol <sup>-1</sup> )                  | 922.72                                                          | 566.66                                                     | 564.64                                                     | 592.69                                                     | 370.00                                              |
| space group                                | $P2_1/n$                                                        | $C2/c$                                                     | $P\bar{1}$                                                 | $P2_12_12_1$                                               | $Pbca$                                              |
| crystal size (mm)                          | 0.17×0.18×0.38                                                  | 0.32×0.38×0.42                                             | 0.17×0.33×0.34                                             | 0.13×0.16×0.27                                             | 0.21×0.45×0.49                                      |
| unit cell parameters                       |                                                                 |                                                            |                                                            |                                                            |                                                     |
| $a$ (Å)                                    | 9.3831(12)                                                      | 21.541(2)                                                  | 9.2006(18)                                                 | 10.6835(18)                                                | 17.331(15)                                          |
| $b$ (Å)                                    | 26.657(3)                                                       | 10.4100(11)                                                | 9.5438(9)                                                  | 17.274(3)                                                  | 13.273(12)                                          |
| $c$ (Å)                                    | 9.8491(12)                                                      | 16.409(5)                                                  | 19.2910(18)                                                | 17.745(3)                                                  | 18.878(18)                                          |
| $\alpha$ (°)                               |                                                                 |                                                            | 81.0103(14)                                                |                                                            |                                                     |
| $\beta$ (°)                                | 100.519(2)                                                      | 121.6531(15)                                               | 87.999(15)                                                 |                                                            |                                                     |
| $\gamma$ (°)                               |                                                                 |                                                            | 68.1159(14)                                                |                                                            |                                                     |
| $V$ (Å <sup>3</sup> )                      | 2422.1(5)                                                       | 3132.2(11)                                                 | 1552.4(4)                                                  | 3274.8(10)                                                 | 4343(7)                                             |
| $Z$                                        | 2                                                               | 4                                                          | 2                                                          | 4                                                          | 8                                                   |
| $T$ (K)                                    | 100(2)                                                          | 100(2)                                                     | 100(2)                                                     | 100(2)                                                     | 110(2)                                              |
| $\mu$ (Mo $K_\alpha$ ) (mm <sup>-1</sup> ) | 2.335                                                           | 1.891                                                      | 1.908                                                      | 1.812                                                      | 0.199                                               |
| reflns                                     | 25518                                                           | 21371                                                      | 19280                                                      | 10065                                                      | 24014                                               |
| independent reflns ( $R_{\text{int}}$ )    | 6076 (0.0784)                                                   | 3922 (0.0444)                                              | 6526 (0.0460)                                              | 6158 (0.0603)                                              | 4227 (0.0582)                                       |
| observed reflns                            | 4711                                                            | 3311                                                       | 5726                                                       | 4488                                                       | 3505                                                |
| parameters                                 | 315                                                             | 202                                                        | 291                                                        | 305                                                        | 221                                                 |
| goodness of                                | 1.010                                                           | 1.033                                                      | 0.943                                                      | 0.928                                                      | 1.040                                               |

|                                      |                |                |                |                |                |
|--------------------------------------|----------------|----------------|----------------|----------------|----------------|
| fit on $F^2$                         |                |                |                |                |                |
| final R indices                      |                |                |                |                |                |
| $R1, wR2$<br>[ $I \geq 2\sigma(I)$ ] | 0.0403, 0.0827 | 0.0290, 0.0686 | 0.0322, 0.0764 | 0.0572, 0.1131 | 0.0394, 0.0962 |
| $R1, wR2$<br>(all data)              | 0.0608, 0.0898 | 0.0386, 0.0718 | 0.0392, 0.0796 | 0.0894, 0.1262 | 0.0509, 0.1046 |

---

## 5. References.

- S1 Bruker, TopSpin 3.2, Bruker BioSpin, Billerica, Massachusetts, 2013.
- S2 Bruker, SAINT-Plus, Bruker AXS Inc., Madison, Wisconsin, USA, 1999.
- S3 Bruker, SADABS, Bruker AXS Inc. Madison, Wisconsin, USA, 2004.
- S4 A. Altomare, G. Cascarano, C. Giacovazzo and A Guagliardi, *A. J. Appl. Crystallogr.* 1993, **26**, 343-350.
- S5 G. M. Sheldrick, *Acta Crystallogr. Sect. A*, 2008, **64**, 112–122.
- S6 K. Brandenburg, DIAMOND, Crystal Impact GbR, Bonn, Germany, 2017.
